# Supplementary material for: Transmission of Vancomycin-Resistant Enterococci in the Hospital Setting: Uncovering the Patient–Environment Interplay
Source: PubMed Central journal article supplement (PMC7074967; doi:10.3390/microorganisms8020203), 2020-01-31
Supplement: microorganisms-08-00203-s001.pdf [file microorganisms-08-00203-s001.pdf]

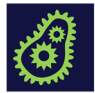

**Supplementary Table S1.** MLST sequence type (ST), collection date and localization of 150 chronologically listed VRE isolates derived from patients (P) and the hospital environment (E).

| Isolate no. | MLST ST | <i>van</i> -gene | Collection date | Localisation         | Ward no. <sup>1</sup> |
|-------------|---------|------------------|-----------------|----------------------|-----------------------|
| P1          | 80      | <i>vanB</i>      | 2013/10/23      | rectal swab          | I                     |
| P2          | 192     | <i>vanB</i>      | 2014/7/8        | rectal swab          | II                    |
| P3          | 192     | <i>vanB</i>      | 2014/8/18       | rectal swab          | I                     |
| P4          | 192     | <i>vanB</i>      | 2014/9/9        | intra-abdominal swab | III                   |
| P5          | 192     | <i>vanB</i>      | 2014/9/29       | rectal swab          | IV                    |
| P6          | 192     | <i>vanB</i>      | 2014/10/12      | rectal swab          | III                   |
| P7          | 192     | <i>vanB</i>      | 2014/10/20      | rectal swab          | IV                    |
| P8          | 192     | <i>vanB</i>      | 2014/11/14      | intra-abdominal swab | III                   |
| P9          | 192     | <i>vanB</i>      | 2015/1/20       | blood culture        | V                     |
| P10         | 192     | <i>vanB</i>      | 2015/4/4        | rectal swab          | I                     |
| P11         | 192     | <i>vanB</i>      | 2015/6/8        | rectal swab          | V                     |
| P12         | 192     | <i>vanB</i>      | 2015/6/9        | rectal swab          | V                     |
| P13         | 192     | <i>vanB</i>      | 2015/6/9        | rectal swab          | V                     |
| P14         | 192     | <i>vanB</i>      | 2015/6/16       | rectal swab          | VI                    |
| P15         | 192     | <i>vanB</i>      | 2015/6/19       | rectal swab          | V                     |
| P16         | 192     | <i>vanB</i>      | 2015/6/23       | rectal swab          | VI                    |
| P17         | 192     | <i>vanB</i>      | 2015/7/7        | rectal swab          | V                     |
| P18         | 192     | <i>vanB</i>      | 2015/7/16       | rectal swab          | V                     |
| P19         | 192     | <i>vanB</i>      | 2015/7/21       | rectal swab          | V                     |
| P20         | 1489    | <i>vanB</i>      | 2015/7/30       | rectal swab          | V                     |
| P21         | 192     | <i>vanB</i>      | 2015/8/6        | rectal swab          | V                     |
| P22         | 192     | <i>vanB</i>      | 2015/8/6        | rectal swab          | V                     |
| P23         | 192     | <i>vanB</i>      | 2015/8/20       | intra-abdominal swab | VII                   |
| P24         | 192     | <i>vanB</i>      | 2016/2/2        | rectal swab          | VIII                  |
| P25         | 117     | <i>vanA</i>      | 2016/2/24       | rectal swab          | III                   |
| P26         | 117     | <i>vanA</i>      | 2016/3/3        | intra-abdominal swab | VII                   |
| P27         | 117     | <i>vanA</i>      | 2016/3/23       | stool sample         | IX                    |
| P28         | 117     | <i>vanA</i>      | 2016/3/26       | rectal swab          | X                     |
| P29         | 117     | <i>vanA</i>      | 2016/3/27       | stool sample         | XI                    |
| P30         | 117     | <i>vanA</i>      | 2016/4/12       | urine culture        | X                     |
| P31         | 117     | <i>vanA</i>      | 2016/4/16       | blood culture        | X                     |
| P32         | 117     | <i>vanA</i>      | 2016/4/26       | rectal swab          | VI                    |
| P33         | 117     | <i>vanA</i>      | 2016/4/26       | urine culture        | I                     |
| P34         | 117     | <i>vanA</i>      | 2016/5/12       | rectal swab          | VI                    |
| P35         | 117     | <i>vanA</i>      | 2016/5/12       | rectal swab          | VI                    |
| P36         | 117     | <i>vanA</i>      | 2016/5/13       | rectal swab          | VI                    |
| P37         | 192     | <i>vanB</i>      | 2016/5/15       | urine culture        | VI                    |
| P38         | 117     | <i>vanA</i>      | 2016/5/17       | stool sample         | XII                   |
| P39         | 117     | <i>vanA</i>      | 2016/6/9        | stool sample         | XIII                  |

|     |     |                   |            |                      |       |
|-----|-----|-------------------|------------|----------------------|-------|
| P40 | 117 | <i>vanA</i>       | 2016/6/9   | rectal swab          | VI    |
| P41 | 203 | <i>vanA</i>       | 2016/6/11  | intra-abdominal swab | XIV   |
| P42 | 117 | <i>vanA</i>       | 2016/6/13  | rectal swab          | V     |
| P43 | 117 | <i>vanA</i>       | 2016/6/24  | rectal swab          | V     |
| P44 | 203 | <i>vanA</i>       | 2016/6/28  | rectal swab          | V     |
| P45 | 203 | <i>vanA</i>       | 2016/6/30  | rectal swab          | XV    |
| P46 | 203 | <i>vanA</i>       | 2016/8/3   | rectal swab          | XVI   |
| P47 | 203 | <i>vanA, vanB</i> | 2016/8/26  | stool sample         | XVII  |
| P48 | 203 | <i>vanA</i>       | 2016/8/26  | stool sample         | III   |
| P49 | 117 | <i>vanA</i>       | 2016/9/3   | rectal swab          | I     |
| P50 | 117 | <i>vanA</i>       | 2016/9/5   | rectal swab          | VI    |
| P51 | 203 | <i>vanA</i>       | 2016/9/5   | rectal swab          | XVIII |
| P52 | 203 | <i>vanA</i>       | 2016/9/22  | tissue               | XVIII |
| P53 | 203 | <i>vanA</i>       | 2016/9/26  | rectal swab          | XVIII |
| P54 | 203 | <i>vanA</i>       | 2016/9/27  | rectal swab          | XI    |
| P55 | 203 | <i>vanA</i>       | 2016/9/27  | rectal swab          | XVI   |
| P56 | 117 | <i>vanA</i>       | 2016/9/28  | rectal swab          | XVIII |
| P57 | 203 | <i>vanA</i>       | 2016/10/2  | rectal swab          | XIX   |
| P58 | 117 | <i>vanA</i>       | 2016/10/8  | rectal swab          | IV    |
| P59 | 203 | <i>vanA</i>       | 2016/10/12 | stool sample         | XX    |
| P60 | 203 | <i>vanA</i>       | 2016/10/17 | rectal swab          | XVI   |
| P61 | 203 | <i>vanA</i>       | 2016/10/18 | rectal swab          | XXI   |
| P62 | 203 | <i>vanA</i>       | 2016/10/19 | rectal swab          | XI    |
| P63 | 203 | <i>vanA</i>       | 2016/10/27 | rectal swab          | XXII  |
| P64 | 203 | <i>vanA</i>       | 2016/10/27 | rectal swab          | XXII  |
| P65 | 203 | <i>vanA</i>       | 2016/11/7  | rectal swab          | XXI   |
| P66 | 203 | <i>vanA</i>       | 2016/11/14 | rectal swab          | XVIII |
| P67 | 203 | <i>vanA</i>       | 2016/11/23 | rectal swab          | VI    |
| P68 | 203 | <i>vanA, vanB</i> | 2016/11/29 | rectal swab          | XI    |
| P69 | 203 | <i>vanA, vanB</i> | 2016/12/5  | rectal swab          | XI    |
| P70 | 203 | <i>vanA, vanB</i> | 2017/1/17  | rectal swab          | XVII  |
| P71 | 203 | <i>vanA</i>       | 2017/2/5   | rectal swab          | XVIII |
| P72 | 203 | <i>vanA</i>       | 2017/2/7   | rectal swab          | XI    |
| P73 | 203 | <i>vanA</i>       | 2017/2/7   | rectal swab          | XI    |
| P74 | 203 | <i>vanA</i>       | 2017/3/13  | rectal swab          | XVIII |
| P75 | 203 | <i>vanA</i>       | 2017/3/13  | rectal swab          | XVIII |
| P76 | 203 | <i>vanA</i>       | 2017/3/15  | rectal swab          | XI    |
| P77 | 203 | <i>vanA</i>       | 2017/3/19  | stool sample         | XXIII |
| P78 | 203 | <i>vanA</i>       | 2017/4/3   | rectal swab          | XVII  |
| P79 | 203 | <i>vanA</i>       | 2017/4/17  | rectal swab          | IV    |
| P80 | 192 | <i>vanB</i>       | 2017/6/7   | rectal swab          | VI    |
| P81 | 721 | <i>vanA</i>       | 2019/7/1   | urine culture        | XXIV  |
| P82 | 721 | <i>vanA</i>       | 2019/7/2   | dialysis catheter    | III   |

|     |     |             |            |                            |        |
|-----|-----|-------------|------------|----------------------------|--------|
| P83 | 721 | <i>vanA</i> | 2019/7/3   | rectal swab                | XIV    |
| P84 | 721 | <i>vanA</i> | 2019/7/5   | urine culture              | XXV    |
| P85 | 721 | <i>vanA</i> | 2019/7/6   | rectal swab                | III    |
| P86 | 721 | <i>vanA</i> | 2019/7/8   | rectal swab                | XIV    |
| P87 | 721 | <i>vanA</i> | 2019/7/19  | stool sample               | XXIV   |
| P88 | 721 | <i>vanA</i> | 2019/7/20  | stool sample               | XXVI   |
| P89 | 721 | <i>vanA</i> | 2019/7/26  | rectal swab                | XXVII  |
| P90 | 203 | <i>vanA</i> | 2017/8/14  | rectal swab                | XVII   |
| P91 | 721 | <i>vanA</i> | 2019/8/24  | stool sample               | XXVI   |
| P92 | 721 | <i>vanA</i> | 2019/8/28  | stool sample               | XXVIII |
| P93 | 203 | <i>vanA</i> | 2017/10/30 | rectal swab                | XVI    |
| P94 | 203 | <i>vanA</i> | 2017/10/30 | rectal swab                | XVI    |
| P95 | 203 | <i>vanA</i> | 2017/11/6  | rectal swab                | XVI    |
| P96 | 203 | <i>vanA</i> | 2017/11/13 | rectal swab                | XVI    |
| P97 | 203 | <i>vanA</i> | 2017/11/30 | rectal swab                | XXIX   |
| E1  | 203 | <i>vanA</i> | 2013/12/13 | wheelchair                 | III    |
| E2  | 203 | <i>vanA</i> | 2013/12/13 | walking frame              | III    |
| E3  | 203 | <i>vanA</i> | 2013/12/30 | nursing staff centre       | X      |
| E4  | 203 | <i>vanA</i> | 2013/12/30 | remote control             | X      |
| E5  | 192 | <i>vanB</i> | 2015/5/11  | first aid cabinet          | VI     |
| E6  | 192 | <i>vanB</i> | 2015/5/11  | washing room               | VI     |
| E7  | 192 | <i>vanB</i> | 2015/5/11  | disposal room              | VI     |
| E8  | 192 | <i>vanB</i> | 2015/5/11  | first aid cabinet          | VI     |
| E9  | 192 | <i>vanB</i> | 2015/5/11  | nursing staff centre       | VI     |
| E10 | 192 | <i>vanB</i> | 2015/5/19  | commode chair              | VI     |
| E11 | 203 | <i>vanA</i> | 2015/5/27  | nursing staff centre       | III    |
| E12 | 203 | <i>vanA</i> | 2015/5/27  | monitor screen             | III    |
| E13 | 203 | <i>vanA</i> | 2015/5/27  | patient file               | III    |
| E14 | 203 | <i>vanA</i> | 2015/5/27  | first aid cabinet          | III    |
| E15 | 203 | <i>vanA</i> | 2015/5/27  | infusion stand             | III    |
| E16 | 203 | <i>vanA</i> | 2015/5/27  | infusion stand             | III    |
| E17 | 203 | <i>vanA</i> | 2015/5/27  | sterile stocks             | III    |
| E18 | 203 | <i>vanA</i> | 2015/5/27  | emergency trolley          | III    |
| E19 | 203 | <i>vanA</i> | 2015/5/27  | nursing staff centre       | III    |
| E20 | 203 | <i>vanA</i> | 2015/5/27  | ECG monitor                | III    |
| E21 | 203 | <i>vanA</i> | 2015/5/27  | first aid cabinet          | III    |
| E22 | 203 | <i>vanA</i> | 2015/5/27  | patient file               | III    |
| E23 | 192 | <i>vanB</i> | 2015/6/2   | medicine cabinet           | VI     |
| E24 | 192 | <i>vanB</i> | 2015/6/2   | nursing staff centre       | V      |
| E25 | 80  | <i>vanB</i> | 2015/6/2   | door pull, patient room    | VI     |
| E26 | 80  | <i>vanB</i> | 2015/6/2   | light switch, patient room | VI     |
| E27 | 117 | <i>vanA</i> | 2016/4/28  | air lock door              | X      |
| E28 | 117 | <i>vanA</i> | 2016/4/28  | first aid cabinet          | X      |

|     |     |                   |            |                            |       |
|-----|-----|-------------------|------------|----------------------------|-------|
| E29 | 117 | <i>vanA</i>       | 2016/4/28  | medicine cabinet           | X     |
| E30 | 117 | <i>vanA</i>       | 2016/4/28  | infusion stand             | X     |
| E31 | 117 | <i>vanA</i>       | 2016/9/9   | door pull, patient room    | XVIII |
| E32 | 203 | <i>vanA</i>       | 2016/9/9   | light switch, patient room | XVIII |
| E33 | 203 | <i>vanA</i>       | 2016/9/9   | patient's bed              | XVIII |
| E34 | 203 | <i>vanA</i>       | 2016/9/9   | light switch, patient room | XVIII |
| E35 | 203 | <i>vanA</i>       | 2016/9/9   | recreation room            | XVIII |
| E36 | 203 | <i>vanA</i>       | 2016/9/9   | medicine cabinet           | XVIII |
| E37 | 203 | <i>vanA</i>       | 2016/9/9   | medicine cabinet           | XVII  |
| E38 | 203 | <i>vanA</i>       | 2016/9/9   | wheelchair                 | XVII  |
| E39 | 203 | <i>vanA</i>       | 2016/9/9   | walking frame              | XVII  |
| E40 | 203 | <i>vanA</i>       | 2016/9/9   | air lock door              | XVII  |
| E41 | 203 | <i>vanA</i>       | 2016/9/9   | heater                     | XVII  |
| E42 | 203 | <i>vanA</i>       | 2016/9/9   | computer keyboard          | XVII  |
| E43 | 203 | <i>vanA</i>       | 2016/10/4  | patient file               | XVIII |
| E44 | 203 | <i>vanA</i>       | 2016/10/4  | patient file               | XVIII |
| E45 | 203 | <i>vanA</i>       | 2016/10/4  | dispenser                  | XVIII |
| E46 | 203 | <i>vanA</i>       | 2016/10/4  | infusion stand             | XVIII |
| E47 | 203 | <i>vanA</i>       | 2016/10/4  | bedside table              | XVII  |
| E48 | 203 | <i>vanA</i>       | 2016/10/8  | recreation room            | XVII  |
| E49 | 203 | <i>vanA</i>       | 2016/10/10 | air lock door              | XVIII |
| E50 | 203 | <i>vanA</i>       | 2016/10/10 | nursing staff centre       | XVIII |
| E51 | 203 | <i>vanA, vanB</i> | 2016/10/10 | nursing staff centre       | XVIII |
| E52 | 721 | <i>vanA</i>       | 2019/8/5   | ventilator                 | III   |
| E53 | 721 | <i>vanA</i>       | 2019/8/5   | medicine cabinet           | III   |

<sup>1</sup> Identical numbers indicate detection of VRE on the same ward.
